# Supplementary material for: Association between high blood pressure and long term cardiovascular events in young adults: systematic review and meta-analysis
Source: PubMed Central journal article supplement — BMJ. 2020 Sep 9;370:m3222. doi: 10.1136/bmj.m3222 (PMC7478061; doi:10.1136/bmj.m3222), 2020-09-09
Supplement: luod054316.ww2.pdf [file luod054316.ww2.pdf]

## **Appendix 2: literature search strategy for the databases**

1. Search strategy for PubMed from inception to 6<sup>th</sup>, March, 2020

#1 ((blood pressure[Title/Abstract])) OR (hypertension[Title/Abstract])

#2 (((((((((((((((((((cardiovascular disease[Title/Abstract]) OR coronary artery disease[Title/Abstract]) OR coronary heart disease[Title/Abstract]) OR myocardial infarction[Title/Abstract]) OR ischemic heart disease[Title/Abstract]) OR ischaemic heart disease[Title/Abstract]) OR acute coronary syndrome[Title/Abstract]) OR stroke[Title/Abstract]) OR cerebrovascular accident[Title/Abstract]) OR cerebrovascular disease[Title/Abstract]) OR cardiovascular events[Title/Abstract]) OR cardiovascular deaths[Title/Abstract]) OR heart failure[Title/Abstract]) OR chronic kidney disease[Title/Abstract]) OR chronic renal disease[Title/Abstract]) OR renal failure[Title/Abstract]) OR kidney failure[Title/Abstract]) OR end-stage renal disease[Title/Abstract]) OR diabetes[Title/Abstract]

#3 (((((((((epidemiologic studies[MeSH Terms])) OR (cohort studies[MeSH Terms])) OR (epidemiologic[Text Word])) OR (longitudinal[Text Word])) OR (cohort[Text Word])) OR (follow up[Text Word])) OR (observational[Text Word])) OR (prospective[Text Word])

#4 ((age[Title/Abstract])) OR (young[Title/Abstract])

#5 humans[MeSH Terms]

#6 review[Publication Type]

#7 #1 AND #2 AND #3 AND #4 AND #5 NOT #6

2. Search strategy for Embase from inception to 6<sup>th</sup>, March, 2020

#1 'cardiovascular disease':ti,ab,kw OR 'coronary artery disease':ti,ab,kw OR  
'coronary heart disease':ti,ab,kw OR 'myocardial infarction':ti,ab,kw OR 'ischemic  
heart disease':ti,ab,kw OR 'acute coronary syndrome':ti,ab,kw OR stroke:ti,ab,kw OR  
'cerebrovascular accident':ti,ab,kw OR 'cerebrovascular disease':ti,ab,kw OR  
'ischaemic heart disease':ti,ab,kw OR 'cardiovascular events':ti,ab,kw OR  
'cardiovascular deaths':ti,ab,kw OR 'heart failure':ti,ab,kw OR 'renal failure':ti,ab,kw  
OR 'kidney failure':ti,ab,kw OR 'chronic kidney disease':ti,ab,kw OR 'chronic renal  
disease':ti,ab,kw OR 'end-stage renal disease':ti,ab,kw OR diabetes:ti,ab,kw

#2 ('blood pressure':ti,ab,kw OR hypertension:ti,ab,kw) NOT 'pulmonary  
hypertension':ti,ab,kw

#3 epidemiologic:ti,ab,kw OR prospective:ti,ab,kw OR cohort:ti,ab,kw OR  
longitudinal:ti,ab,kw OR 'follow up':ti,ab,kw

#4 age:ti,ab,kw OR young:ti,ab,kw

#5 #1 AND #2 AND #3 AND #4 AND ([adolescent]/lim OR [adult]/lim OR  
[aged]/lim OR [middle aged]/lim OR [young adult]/lim) AND [humans]/lim

3. Search strategy for Web of science from inception to 6<sup>th</sup>, March, 2020

#1 TS=(early adulthood) OR TS=(young\*) OR TS=(early life)

#2 TS=(cohort) OR TS=(longitudinal) OR TS=(follow ) OR TS=(prospective) OR  
TS=(observational)

#3 TS=(hypertension) OR TS=(blood pressure)

#4 TS=(cardiovascular disease) OR TS=(coronary artery disease) OR TS=(coronary  
heart disease) OR TS=(myocardial infarction) OR TS=(ischemic heart disease) OR  
TS=(ischaemic heart disease) OR TS=(acute coronary syndrome) OR

TS=(cerebrovascular accident) OR TS=(cerebrovascular accident) OR TS=(stroke)

OR TS=(cardiovascular events) OR TS=(cardiovascular deaths) OR TS=(heart

failure) OR TS=(renal failure) OR TS=(kidney failure) OR TS=(chronic renal

disease) OR TS=(chronic kidney disease) OR TS=(end-stage renal disease) OR

TS=(diabetes)

#5 #1 AND #2 AND #3 AND #4
