# Supplementary material for: Association between high blood pressure and long term cardiovascular events in young adults: systematic review and meta-analysis
Source: PubMed Central journal article supplement — BMJ. 2020 Sep 9;370:m3222. doi: 10.1136/bmj.m3222 (PMC7478061; doi:10.1136/bmj.m3222), 2020-09-09
Supplement: luod054316.ww3.pdf [file luod054316.ww3.pdf]

### Appendix 3

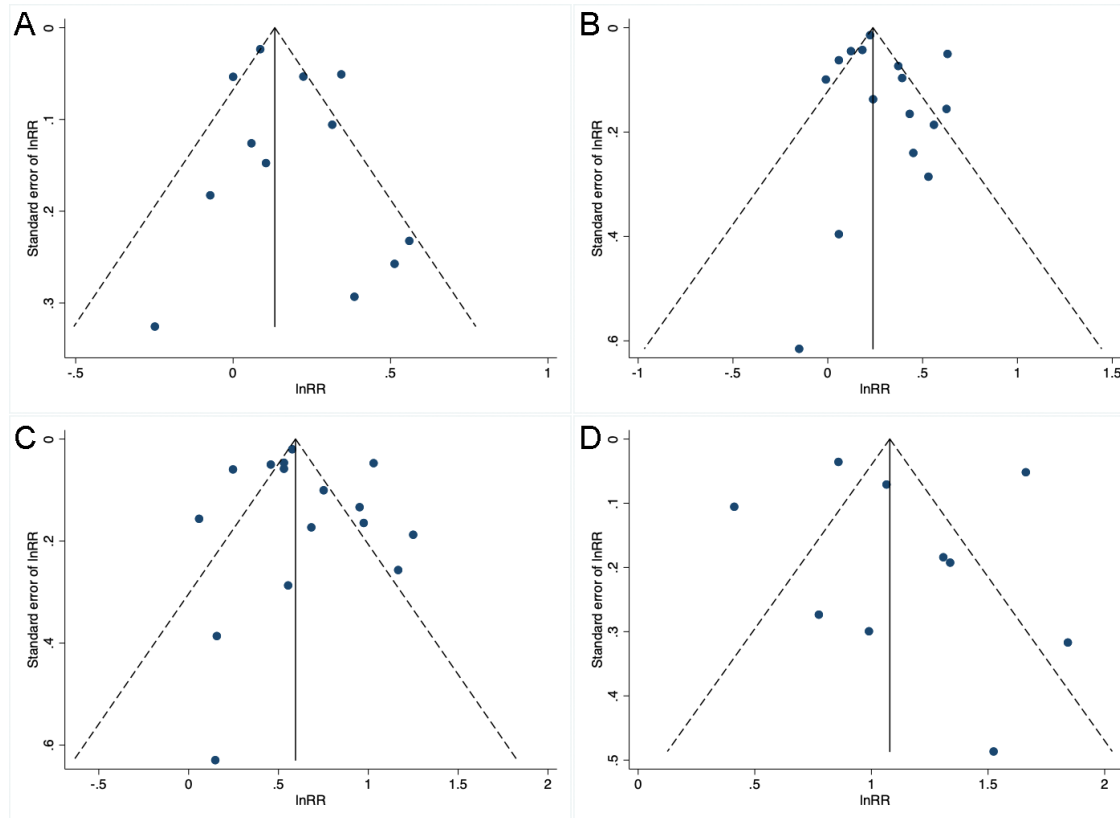

Figure S1. Funnel plots for the outcome of cardiovascular events. A. Funnel plot for cardiovascular events comparing normal BP and optimal BP (Egger's test for funnel plot asymmetry;  $p=0.38$ ). B. Funnel plot for cardiovascular events comparing high normal BP and optimal BP (Egger's test for funnel plot asymmetry;  $p=0.39$ ). C. Funnel plot for cardiovascular events comparing grade 1 hypertension and optimal BP (Egger's test for funnel plot asymmetry;  $p=0.65$ ). D. Funnel plot for cardiovascular events comparing grade 2 hypertension and optimal BP (Egger's test for funnel plot asymmetry;  $p=0.78$ ). BP, blood pressure.

Table S1 GRADE summary of findings for the associations of increased blood pressure and individual study outcomes.

| <b>Optimal compared to normal BP</b>      |                                          |                                   |                             |                                 |                                    |
|-------------------------------------------|------------------------------------------|-----------------------------------|-----------------------------|---------------------------------|------------------------------------|
| Outcomes                                  | Illustrative comparative risks* (95% CI) |                                   | Relative effect<br>(95% CI) | No of Participants<br>(studies) | Quality of the evidence<br>(GRADE) |
|                                           | Assumed risk<br>Optimal                  | Corresponding risk<br>Normal      |                             |                                 |                                    |
| Cardiovascular events                     | Study population                         |                                   | RR 1.19                     | 2365285                         | ⊕⊕⊕⊕                               |
|                                           | 40 per 1000                              | 48 per 1000<br>(43 to 52)         | (1.08 to 1.31)              | (12 studies)                    | moderate <sup>1,2,3</sup>          |
| Coronary heart disease                    | Study population                         |                                   | RR 1.09                     | 1577243                         | ⊕⊕⊕⊕                               |
|                                           | 20 per 1000                              | 22 per 1000<br>(20 to 24)         | (0.99 to 1.21)              | (10 studies)                    | moderate <sup>1,2,3</sup>          |
| Stroke                                    | Study population                         |                                   | RR 1.14                     | 1574119                         | ⊕⊕⊕⊕                               |
|                                           | 20 per 1000                              | 23 per 1000<br>(21 to 25)         | (1.03 to 1.27)              | (9 studies)                     | moderate <sup>1,2,3,4</sup>        |
| All-cause mortality                       | Study population                         |                                   | RR 0.95                     | 753687                          | ⊕⊕⊕⊕                               |
|                                           | 100 per 1000                             | 95 per 1000<br>(93 to 97)         | (0.93 to 0.97)              | (6 studies)                     | low <sup>1,2,4,5</sup>             |
| <b>Optimal compared to high normal BP</b> |                                          |                                   |                             |                                 |                                    |
| Outcomes                                  | Illustrative comparative risks* (95% CI) |                                   | Relative effect<br>(95% CI) | No of Participants<br>(studies) | Quality of the evidence<br>(GRADE) |
|                                           | Assumed risk<br>Optimal                  | Corresponding risk<br>High normal |                             |                                 |                                    |
|                                           | Study population                         |                                   |                             |                                 |                                    |

|                        |                                  |                             |                           |                         |                                   |
|------------------------|----------------------------------|-----------------------------|---------------------------|-------------------------|-----------------------------------|
| Cardiovascular events  | 40 per 1000                      | 54 per 1000<br>(49 to 60)   | RR 1.35<br>(1.22 to 1.49) | 2954416<br>(16 studies) | ⊕⊕⊕⊖<br>moderate <sup>1,2,3</sup> |
| Coronary heart disease | Study population<br>20 per 1000  | 25 per 1000<br>(24 to 27)   | RR 1.25<br>(1.18 to 1.34) | 2439595<br>(14 studies) | ⊕⊕⊕⊖<br>moderate <sup>1,2,3</sup> |
| Stroke                 | Study population<br>20 per 1000  | 25 per 1000<br>(23 to 28)   | RR 1.27<br>(1.15 to 1.39) | 2435892<br>(13 studies) | ⊕⊕⊕⊖<br>moderate <sup>1,2,3</sup> |
| All-cause mortality    | Study population<br>100 per 1000 | 107 per 1000<br>(98 to 117) | RR 1.07<br>(0.98 to 1.17) | 517983<br>(8 studies)   | ⊕⊕⊕⊖<br>low <sup>1,2,4,5</sup>    |

### Optimal compared to Grade 1 hypertension

| Outcomes               | Illustrative comparative risks* (95% CI) |                           | Relative effect<br>(95% CI) | No of Participants<br>(studies) | Quality of the evidence<br>(GRADE) |
|------------------------|------------------------------------------|---------------------------|-----------------------------|---------------------------------|------------------------------------|
|                        | Assumed risk                             | Corresponding risk        |                             |                                 |                                    |
|                        | Optimal                                  | Grade 1 hypertension      |                             |                                 |                                    |
| Cardiovascular events  | Study population<br>40 per 1000          | 77 per 1000<br>(67 to 88) | RR 1.92<br>(1.68 to 2.19)   | 2182273<br>(16 studies)         | ⊕⊕⊕⊕<br>high <sup>2,3</sup>        |
| Coronary heart disease | Study population<br>20 per 1000          | 33 per 1000<br>(30 to 37) | RR 1.65<br>(1.48 to 1.84)   | 1688116<br>(14 studies)         | ⊕⊕⊕⊖<br>moderate <sup>1,2,3</sup>  |
| Stroke                 | Study population                         |                           |                             |                                 |                                    |

|                                                 |                                          |                              |                             |                                 |                                    |
|-------------------------------------------------|------------------------------------------|------------------------------|-----------------------------|---------------------------------|------------------------------------|
|                                                 | 20 per 1000                              | 38 per 1000<br>(31 to 46)    | RR 1.89<br>(1.56 to 2.28)   | 1683223<br>(13 studies)         | ⊕⊕⊕⊖<br>moderate <sup>1,2,3</sup>  |
| All-cause mortality                             | Study population                         |                              | RR 1.42                     | 481964                          | ⊕⊕⊕⊖                               |
|                                                 | 100 per 1000                             | 142 per 1000<br>(118 to 171) | (1.18 to 1.71)              | (8 studies)                     | low <sup>2,4</sup>                 |
| <b>Optimal compared to Grade 2 hypertension</b> |                                          |                              |                             |                                 |                                    |
| Outcomes                                        | Illustrative comparative risks* (95% CI) |                              | Relative effect<br>(95% CI) | No of Participants<br>(studies) | Quality of the evidence<br>(GRADE) |
|                                                 | Assumed risk                             | Corresponding risk           |                             |                                 |                                    |
|                                                 | Optimal                                  | Grade 2 hypertension         |                             |                                 |                                    |
| Cardiovascular events                           | Study population                         |                              | RR 3.15                     | 178652                          | ⊕⊕⊕⊕                               |
|                                                 | 40 per 1000                              | 126 per 1000<br>(92 to 172)  | (2.31 to 4.29)              | (10 studies)                    | high <sup>2,3,6</sup>              |
| Coronary heart disease                          | Study population                         |                              | RR 2.27                     | 136659                          | ⊕⊕⊕⊕                               |
|                                                 | 20 per 1000                              | 45 per 1000<br>(37 to 56)    | (1.86 to 2.78)              | (8 studies)                     | high <sup>2,3,4,6</sup>            |
| Stroke                                          | Study population                         |                              | RR 2.87                     | 134715                          | ⊕⊕⊕⊖                               |
|                                                 | 20 per 1000                              | 57 per 1000<br>(41 to 79)    | (2.07 to 3.96)              | (7 studies)                     | moderate <sup>1,2,3,4</sup>        |
| All-cause mortality                             | Study population                         |                              | RR 2.01                     | 14450                           | ⊕⊕⊕⊕                               |
|                                                 | 100 per 1000                             | 201 per 1000<br>(138 to 293) | (1.38 to 2.93)              | (5 studies)                     | high <sup>2,4,6,7</sup>            |

\*The basis for the assumed risk (e.g. the median control group risk across studies) is provided in footnotes. The corresponding risk (and its 95% confidence interval) is based on the assumed risk in the comparison group

---

and the relative effect of the intervention (and its 95% CI).

CI: Confidence interval; RR: Risk ratio;

---

GRADE Working Group grades of evidence

High quality: Further research is very unlikely to change our confidence in the estimate of effect.

Moderate quality: Further research is likely to have an important impact on our confidence in the estimate of effect and may change the estimate.

Low quality: Further research is very likely to have an important impact on our confidence in the estimate of effect and is likely to change the estimate.

Very low quality: We are very uncertain about the estimate.

---

<sup>1</sup> The risks associated with the observed blood pressure category were inconsistent among the included studies.

<sup>2</sup> Information on antihypertensive treatments was limited and thus its effect on outcome risks could not be totally eliminated.

<sup>3</sup> The associated risks increased across blood pressure categories.

<sup>4</sup> The number of included studies was less than 10 and thus the assessment of publication bias was not recommended in this situation.

<sup>5</sup> The risk of all-cause mortality associated with high blood pressure increased from the level above 140/90 mmHg.

<sup>6</sup> The risk associated with grade 2 hypertension was consistent and robust across studies.

<sup>7</sup> The risk of all-cause mortality associated with high blood pressure increased in a dose-responsive manner when the BP was above the level of 140/90 mm Hg.

---

Table S2. Sensitivity and heterogeneity analysis of pooled relative risks of cardiovascular events across BP categories.

|                                                                 | Normal BP              |    |           | High normal BP         |    |           | Grade 1 hypertension   |    |           | Grade 2 hypertension   |   |           |
|-----------------------------------------------------------------|------------------------|----|-----------|------------------------|----|-----------|------------------------|----|-----------|------------------------|---|-----------|
|                                                                 | RR(95%CI)              | f  | I-squared | RR(95%CI)              | f  | I-squared | RR(95%CI)              | f  | I-squared | RR(95%CI)              | f | I-squared |
| Overall studies                                                 | 1.19<br>(1.08 to 1.31) | 11 | 74.1%     | 1.36<br>(1.22 to 1.49) | 15 | 85.6%     | 1.92<br>(1.68 to 2.19) | 15 | 91.5%     | 3.15<br>(2.31 to 4.29) | 9 | 95.8%     |
| Excluding studies with high risk of bias                        | 1.19<br>(1.08 to 1.31) | 11 | 74.1%     | 1.35<br>(1.22 to 1.49) | 14 | 86.5%     | 1.93<br>(1.69 to 2.20) | 14 | 92.0%     | 3.08<br>(2.24 to 4.24) | 8 | 96.3%     |
| Excluding studies with all male participants                    | 1.14<br>(1.03 to 1.27) | 6  | 57.8%     | 1.36<br>(1.21 to 1.53) | 8  | 65.9%     | 2.03<br>(1.72 to 2.39) | 8  | 84.6%     | 3.71<br>(2.29 to 6.02) | 3 | 82.3%     |
| Excluding studies with only military members                    | 1.18<br>(1.06 to 1.33) | 10 | 74.5%     | 1.38<br>(1.24 to 1.53) | 14 | 85.3%     | 1.94<br>(1.68 to 2.24) | 14 | 92.0%     | 3.15<br>(2.31 to 4.29) | 9 | 95.8%     |
| Excluding studies of retrospective design                       | 1.19<br>(1.04 to 1.36) | 9  | 71.8%     | 1.38<br>(1.17 to 1.64) | 12 | 87.2%     | 1.94<br>(1.57 to 2.41) | 12 | 92.9%     | 3.20<br>(2.21 to 4.64) | 8 | 96.3%     |
| Excluding studies with nonequivalent outcomes                   | 1.18<br>(1.06 to 1.30) | 10 | 75.2%     | 1.35<br>(1.20 to 1.51) | 13 | 86.9%     | 1.87<br>(1.61,2.17)    | 13 | 92.0%     | 3.20<br>(2.21 to 4.64) | 8 | 96.3%     |
| Limiting studies reporting some levels of adjustment            | 1.17<br>(1.05 to 1.32) | 9  | 76.6%     | 1.39<br>(1.22 to 1.58) | 11 | 88.0%     | 1.92<br>(1.62 to 2.29) | 11 | 93.4%     | 3.02<br>(1.98 to 4.58) | 7 | 97.2%     |
| Limiting studies using only mercury monitor for BP measurements | 1.22<br>(0.91 to 1.64) | 3  | 66.4%     | 1.80<br>(1.63 to 1.99) | 5  | 3.9%      | 2.40<br>(1.92 to 3.01) | 5  | 53.5%     | 4.12<br>(3.11 to 5.46) | 5 | 67.8%     |
| Limiting studies involving only untreated participants          | 1.12<br>(0.97 to 1.29) | 5  | 51.9%     | 1.24<br>(1.09 to 1.41) | 5  | 32.6%     | 1.76<br>(1.33 to 2.32) | 5  | 77.0%     | 2.75<br>(1.82 to 4.15) | 2 | 55.8%     |

Abbreviation: RR, relative risk; CI, confidence interval; f, degrees of freedom; BP, blood pressure. BMI, body mass index.
